# Supplementary material for: Cylindrospermopsin-Microcystin-LR Combinations May Induce Genotoxic and Histopathological Damage in Rats
Source: PubMed Central journal article supplement (PMC7354441; doi:10.3390/toxins12060348), 2020-05-26
Supplement: toxins-12-00348-s001.pdf [file toxins-12-00348-s001.pdf]

## **Supplementary Materials: Cylindrospermopsin-Microcystin-LR Combinations May Induce Genotoxic and Histopathological Damage in Rats**

**Leticia Díez-Quijada, Concepción Medrano-Padial, María Llana-Ruiz-Cabello, Giorgiana M. Cătunescu, Rosario Moyano, Maria A. Risalde, Ana M. Cameán and Ángeles Jos**

**Table S1.** Measurements (MN, alkaline comet and enzyme-modified comet assays) obtained in the target tissues (liver, stomach and blood) by dose and treatment assayed in male and female rats.

| Genotoxicity Measurements (Males)  |                             |                      |         |       |                          |         |       |                     |         |       |
|------------------------------------|-----------------------------|----------------------|---------|-------|--------------------------|---------|-------|---------------------|---------|-------|
| Doses                              | Enzyme-Modified Comet Assay |                      |         |       |                          |         |       |                     |         |       |
|                                    | % MN Test                   | Standard Comet Assay |         |       | Endo III-Sensitive Sites |         |       | Fpg-Sensitive Sites |         |       |
|                                    | Bone Marrow                 | Liver                | Stomach | Blood | Liver                    | Stomach | Blood | Liver               | Stomach | Blood |
| Negative control<br>(water)        | 1.6                         | 0.60                 | 3.45    | 0.15  | 8.9                      | 1.28    | 0.15  | 2.70                | 2.50    | 0.75  |
|                                    | 0.22                        | 0.00                 | 0.01    | 0.25  | 1.2                      | 9.43    | 4.22  | 10.10               | 12.00   | 0.35  |
|                                    | 0.16                        | 0.00                 | 0.01    | 0.22  | 3.1                      | 10.0    | 0.70  | 4.62                | 2.95    | 0.08  |
|                                    | 0.16                        | 0.05                 | 4.50    | 0.12  | 10.0                     | 8.4     | 1.10  | 10.60               | 4.50    | 0.05  |
|                                    | 0.12                        | 0.68                 | 0.00    | 0.18  | 6.40                     | 8.8     | 0.00  | 3.50                | 5.80    | 0.10  |
| Solvent control<br>(0.5% MeOH)     | 1.58                        | 0.50                 | 6.02    | 0.00  | 3.34                     | 1.03    | 2.3   | 2.90                | 4.31    | 0.04  |
|                                    | 1.10                        | 0.00                 | 4.00    | 3.20  | 0.44                     | 0.16    | 0.03  | 2.95                | 1.15    | 0.45  |
|                                    | 0.34                        | 0.00                 | 0.00    | 0.00  | 0.51                     | 0.30    | 0.03  | 2.90                | 0.01    | 0.01  |
|                                    | 0.48                        | 0.20                 | 0.00    | 0.05  | 0.74                     | 0.53    | 0.70  | 8.00                | 0.00    | 0.10  |
|                                    | 0.64                        | 0.50                 | 5.80    | 0.07  | 11.60                    | 5.64    | 0.01  | 7.30                | 0.00    | 0.06  |
| Positive Control                   | 1.84                        | 34.34                | 43.48   | 37.28 | 29.05                    | 40.2    | 27.4  | 25.70               | 40.7    | 33.60 |
|                                    | 2.10                        | 16.52                | 17.42   | 15.70 | 25.35                    | 32.9    | 30.4  | 23.15               | 35.0    | 25.80 |
|                                    | 1.84                        | 22.89                | 35.11   | 40.91 | 19.3                     | 37.2    | 24.4  | 31.95               | 33.45   | 28.80 |
| 7.5 + 75 µg/kg<br>b.w. CYN/MC-LR   | 2.40                        | 0.50                 | 1.50    | 0.01  | 12.9                     | 12.6    | 0.41  | 9.18                | 8.30    | 0.07  |
|                                    | 1.54                        | 0.25                 | 2.30    | 0.25  | 7.55                     | 16.4    | 0.00  | 6.34                | 14.08   | 0.07  |
|                                    | 1.95                        | 0.15                 | 2.10    | 0.40  | 7.19                     | 9.85    | 1.99  | 5.19                | 6.35    | 0.08  |
|                                    | 1.50                        | 0.16                 | 0.90    | 0.05  | 8.18                     | 10.45   | 0.20  | 8.66                | 13.34   | 0.26  |
|                                    | 1.36                        | 0.80                 | 1.50    | 0.22  | 9.34                     | 12.54   | 0.42  | 14.55               | 14.68   | 0.49  |
| 23.7 + 237 µg/kg<br>b.w. CYN/MC-LR | 2.34                        | 0.23                 | 0.09    | 2.15  | 0.63                     | 6.10    | 0.09  | 0.80                | 3.34    | 0.01  |
|                                    | 1.28                        | 0.33                 | 0.06    | 0.1   | 3.11                     | 0.35    | 0.06  | 0.60                | 2.95    | 0.01  |
|                                    | 1.68                        | 0.20                 | 0.02    | 0.09  | 0.08                     | 4.65    | 0.40  | 0.20                | 3.26    | 0.05  |
|                                    | 2.10                        | 0.27                 | 0.05    | 0.04  | 0.76                     | 8.80    | 0.02  | 0.35                | 10.98   | 0.02  |
|                                    | 1.74                        | 0.12                 | 0.10    | 0.00  | 0.42                     | 5.10    | 0.07  | 0.60                | 11.87   | 0.02  |
| 75 + 750 µg/kg<br>b.w. CYN/MC-LR   | 2.68                        | 2.18                 | 9.70    | 0.65  | 9.0                      | 6.20    | 0.00  | 15.45               | 12.95   | 0.07  |
|                                    | 1.54                        | 2.00                 | 1.02    | 0.10  | 6.9                      | 4.80    | 0.04  | 6.85                | 7.00    | 0.20  |
|                                    | 1.48                        | 1.23                 | 0.50    | 0.00  | 4.7                      | 4.20    | 0.04  | 8.70                | 4.70    | 0.13  |
|                                    | 1.60                        | 1.17                 | 0.45    | 0.05  | 2.6                      | 5.30    | 0.09  | 3.50                | 8.00    | 0.07  |
|                                    | 2.12                        | 1.82                 | 9.20    | 6.90  | 1.7                      | 4.75    | 0.58  | 3.75                | 5.70    | 3.64  |

  

| Genotoxicity Measurements (Females) |                             |                      |  |  |                          |  |  |                     |  |  |
|-------------------------------------|-----------------------------|----------------------|--|--|--------------------------|--|--|---------------------|--|--|
| Doses                               | Enzyme-Modified comet assay |                      |  |  |                          |  |  |                     |  |  |
|                                     | % MN Test                   | Standard Comet Assay |  |  | Endo III-Sensitive Sites |  |  | Fpg-Sensitive Sites |  |  |

|                                 | Bone Marrow | Liver | Stomach | Blood | Liver | Stomach | Blood | Liver | Stomach | Blood |
|---------------------------------|-------------|-------|---------|-------|-------|---------|-------|-------|---------|-------|
| Negative control (water)        | 0.84        | 0.59  | 0.00    | 0.75  | 0.17  | 11.4    | 0.64  | 1.85  | 6.60    | 2.59  |
|                                 | 1.14        | 1.80  | 0.20    | 0.82  | 0.30  | 4.1     | 3.59  | 1.20  | 8.40    | 0.49  |
|                                 | 0.48        | 0.17  | 0.45    | 0.08  | 0.82  | 12.7    | 0.00  | 3.85  | 12.90   | 0.01  |
|                                 | 0.44        | 0.03  | 0.50    | 1.17  | 3.79  | 10.7    | 0.04  | 3.80  | 5.40    | 0.01  |
| Solvent control (0.5% MeOH)     | 0.38        | 0.17  | 1.30    | 0.03  | 2.76  | 11.9    | 1.10  | 5.30  | 10.4    | 1.20  |
|                                 | 0.70        | 1.43  | 0.07    | 0.02  | 0.60  | 5.79    | 1.10  | 2.16  | 7.36    | 1.60  |
|                                 | 0.20        | 1.48  | 0.07    | 0.04  | 0.63  | 2.54    | 0.03  | 3.57  | 4.52    | 1.60  |
|                                 | 0.84        | 0.28  | 0.05    | 0.05  | 0.46  | 3.06    | 2.05  | 1.56  | 11.22   | 2.15  |
| Positive Control                | 0.54        | 0.44  | 0.06    | 0.04  | 2.03  | 6.19    | 0.35  | 2.27  | 7.83    | 0.01  |
|                                 | 0.60        | 1.08  | 0.10    | 0.03  | 2.03  | 8.22    | 4.50  | 4.98  | 4.86    | 6.10  |
| 7.5 + 75 µg/kg b.w. CYN/MC-LR   | 3.28        | 23.80 | 37.50   | 29.35 | 23.2  | 46.95   | 30.0  | 24.01 | 37.90   | 31.30 |
|                                 | 1.50        | 19.73 | 37.90   | 12.54 | 28.8  | 43.6    | 24.05 | 21.88 | 40.40   | 26.95 |
|                                 | 2.64        | 23.44 | 39.00   | 36.22 | 29.7  | 49.7    | 29.2  | 27.57 | 35.50   | 25.00 |
| 23.7 + 237 µg/kg b.w. CYN/MC-LR | 2.04        | 0.10  | 4.90    | 0.14  | 1.45  | 9.70    | 0.2   | 1.75  | 7.40    | 0.95  |
|                                 | 2.30        | 0.93  | 5.90    | 0.16  | 7.38  | 14.40   | 3.9   | 8.70  | 10.20   | 0.08  |
|                                 | 1.92        | 0.62  | 1.95    | 0.16  | 0.70  | 7.00    | 2.6   | 1.70  | 8.30    | 0.40  |
|                                 | 1.92        | 0.03  | 2.10    | 0.03  | 1.80  | 11.5    | 2.7   | 2.60  | 10.50   | 2.80  |
|                                 | 1.72        | 0.99  | 4.45    | 0.03  | 2.64  | 11.00   | 1.02  | 4.90  | 3.60    | 5.10  |
| 75 + 750 µg/kg b.w. CYN/MC-LR   | 2.02        | 0.48  | 1.90    | 0.70  | 0.41  | 6.90    | 0.02  | 0.00  | 2.00    | 0.02  |
|                                 | 2.26        | 0.09  | 2.70    | 0.34  | 0.99  | 5.60    | 1.29  | 0.35  | 1.05    | 0.07  |
|                                 | 2.12        | 2.71  | 2.21    | 0.06  | 2.05  | 8.90    | 0.07  | 0.40  | 7.40    | 0.00  |
|                                 | 1.86        | 0.12  | 2.15    | 0.01  | 1.73  | 2.90    | 0.02  | 1.50  | 6.50    | 0.00  |
|                                 | 2.18        | 0.11  | 2.95    | 0.53  | 1.49  | 3.70    | 0.01  | 4.00  | 3.60    | 0.00  |
| 75 + 750 µg/kg b.w. CYN/MC-LR   | 2.08        | 1.20  | 1.00    | 0.10  | 4.93  | 3.62    | 3.86  | 4.10  | 8.00    | 2.47  |
|                                 | 2.34        | 0.05  | 1.15    | 1.76  | 0.43  | 1.95    | 0.44  | 1.00  | 5.00    | 0.57  |
|                                 | 2.40        | 0.10  | 2.95    | 0.03  | 0.15  | 7.02    | 0.28  | 1.35  | 6.60    | 0.94  |
|                                 | 1.80        | 0.95  | 1.60    | 1.38  | 1.93  | 1.93    | 0.64  | 0.05  | 11.40   | 0.30  |
|                                 | 2.46        | 1.20  | 1.64    | 2.00  | 0.02  | 7.00    | 0.77  | 1.00  | 10.50   | 0.22  |

The values are expressed as individual measurements.

**Table S2.** Summary statistic for treatment groups including both sexes (male and female) for the standard and enzyme-modified comet assay in liver, stomach and blood cells.

|                          | Enzyme-Modified Comet Assay |                     |                   |                           |                     |                   |                      |                     |                   |
|--------------------------|-----------------------------|---------------------|-------------------|---------------------------|---------------------|-------------------|----------------------|---------------------|-------------------|
|                          | Standard Comet Assay        |                     |                   | Endo-III Sensitives Sites |                     |                   | Fpg-Sensitives Sites |                     |                   |
|                          | Liver (mean ± SD)           | Stomach (mean ± SD) | Blood (mean ± SD) | Liver (mean ± SD)         | Stomach (mean ± SD) | Blood (mean ± SD) | Liver (mean ± SD)    | Stomach (mean ± SD) | Blood (mean ± SD) |
| Negative control (water) | 0.41 ± 0.56                 | 1.04 ± 1.62         | 0.38 ± 0.39       | 3.74 ± 3.56               | 8.87 ± 3.59         | 1.15 ± 1.52       | 4.75 ± 3.19          | 7.15 ± 3.65         | 0.56 ± 0.81       |

|                             |                                 |                                 |                                  |                              |                               |                                |                            |                              |                                |
|-----------------------------|---------------------------------|---------------------------------|----------------------------------|------------------------------|-------------------------------|--------------------------------|----------------------------|------------------------------|--------------------------------|
| Solvent control (0.5% MeOH) | 0.60 ± 0.58<br>(1.47-fold)      | 1.62 ± 2.58<br>(1.55-fold)      | 0.38 ± 1.06<br>(1.01-fold)       | 2.24 ± 3.43<br>(0.59-fold)   | 3.35 ± 2.92 (0.38-fold)       | 0.84 ± 1.21 (0.73-fold)        | 3.86 ± 2.20 (0.81-fold)    | 4.13 ± 3.87<br>(0.58-fold)   | 1.21 ± 1.90 (2.15-fold)        |
| 7.5 + 75 µg/kg CYN/MC-LR    | 0.45 ± 0.36<br>(1.11-fold)      | 2.76 ± 1.69<br>(2.65-fold)      | 0.15 ± 0.12<br>(0.38-fold)       | 5.91 ± 4.04<br>(1.58-fold)   | 11.54 ± 2.63 (1.30-fold)      | 1.34 ± 1.36 (1.16-fold)        | 6.36 ± 4.03 (1.34-fold)    | 9.68 ± 3.59<br>(1.35-fold)   | 1.03 ± 1.65 (1.83-fold)        |
| 23.7 + 237 µg/kg CYN/MC-LR  | 0.47 ± 0.80<br>(1.14-fold)      | 1.22 ± 1.26<br>(1.17-fold)      | 0.40±0.66 (1.07-fold)            | 1.17 ± 0.93<br>(0.31-fold)   | 5.3 ± 2.62 (0.60-fold)        | 0.21 ± 0.40 (0.18-fold)        | 0.88 ± 1.17 (0.19-fold)    | 5.30 ± 3.75<br>(0.74-fold)   | 0.02 ± 0.02 (0.04-fold)        |
| 75 + 750 µg/kg CYN/MC-LR    | 1.19 ± 0.71<br>(2.91-fold)      | 2.92 ± 3.51<br>(2.80-fold)      | 1.30±2.11 (3.44-fold)            | 3.24 ± 3.05<br>(0.86-fold)   | 4.68 ± 1.82 (0.53-fold)       | 0.67 ± 1.15 (0.58-fold)        | 4.58 ± 4.70 (0.96-fold)    | 7.99 ± 2.80<br>(1.12-fold)   | 0.86 ± 1.22 (1.53-fold)        |
| Positive control (EMS)      | 23.45 ± 6.01***<br>(57.34-fold) | 35.07 ± 9.07***<br>(33.65-fold) | 28.67 ± 11.91***<br>(76.04-fold) | 25.9 ± 4.10**<br>(6.92-fold) | 41.76 ± 6.25**<br>(4.71-fold) | 27.58 ± 2.79**<br>(23.90-fold) | 25.71 ± 3.65** (5.41-fold) | 37.16 ± 2.99**<br>(5.2-fold) | 28.58 ± 3.34**<br>(50.75-fold) |

Negative control: Water; Solvent control: 0.5% MeOH; CYN: Cylindrospermopsin; MC-LR: Microcystin-LR; Positive control : Ethylmethanesulfonate (EMS). The levels of DNA strand breaks are expressed as % DNA in the tail of the comets. All values are represented as mean ± SD. Significantly different from control (\*\**p*<0.01; \*\*\**p* < 0.001).

**Table S3.** Relative weight (RW) (excised wet organ weight /animal weight) of liver and stomach from exposed male rats.

| Male            |                                                         |                                                            |                                                         |                                                           |                                                       |                                                       |
|-----------------|---------------------------------------------------------|------------------------------------------------------------|---------------------------------------------------------|-----------------------------------------------------------|-------------------------------------------------------|-------------------------------------------------------|
|                 | Negative control (Water)<br><i>n</i> = 5<br>(mean ± SD) | Solvent Control (0.5% MeOH)<br><i>n</i> = 5<br>(mean ± SD) | 7.5 + 75 µg/mL CYN/MC-LR<br><i>n</i> = 5<br>(mean ± SD) | 23.7 + 237 µg/mL CYN/MC-LR<br><i>n</i> = 5<br>(mean ± SD) | 75+750 µg/mL CYN/MC-LR<br><i>n</i> = 5<br>(mean ± SD) | Positive control (EMS)<br><i>n</i> = 3<br>(mean ± SD) |
| Body weight (g) | 145.19 ± 27.56                                          | 156.54 ± 24.26                                             | 132.53 ± 12.18                                          | 164.75 ± 5.42                                             | 146.88 ± 15.75                                        | 138.38 ± 14.86                                        |
| Liver           | 3.14 ± 0.03                                             | 3.22 ± 0.17                                                | 3.25 ± 0.11                                             | 3.02 ± 0.17                                               | 3.24 ± 0.25                                           | 3.52 ± 0.24                                           |
| Stomach         | 0.49 ± 0.06                                             | 0.38 ± 0.05                                                | 0.52 ± 0.09                                             | 0.47 ± 0.09                                               | 0.46 ± 0.15                                           | 0.84 ± 0.30**                                         |

Negative control: water; Solvent control: 0.5% MeOH; CYN: Cylindrospermopsin; MC-LR: Microcystin-LR; Positive control : Ethylmethanesulfonate (EMS). The values are expressed as mean ± SD. Significantly different from the negative control (\*\**p* < 0.01).

**Table S4.** Relative weight (RW) (excised wet organ weight /animal weight) of liver and stomach from exposed female rats.

| Female          |                                                         |                                                            |                                                         |                                                           |                                                         |                                                       |
|-----------------|---------------------------------------------------------|------------------------------------------------------------|---------------------------------------------------------|-----------------------------------------------------------|---------------------------------------------------------|-------------------------------------------------------|
|                 | Negative Control (Water)<br><i>n</i> = 5<br>(mean ± SD) | Solvent Control (0.5% MeOH)<br><i>n</i> = 5<br>(mean ± SD) | 7.5 + 75 µg/mL CYN/MC-LR<br><i>n</i> = 5<br>(mean ± SD) | 23.7 + 237 µg/mL CYN/MC-LR<br><i>n</i> = 5<br>(mean ± SD) | 75 + 750 µg/mL CYN/MC-LR<br><i>n</i> = 5<br>(mean ± SD) | Positive Control (EMS)<br><i>n</i> = 3<br>(mean ± SD) |
| Body weight (g) | 168.35 ± 15.57                                          | 173.53 ± 16.29                                             | 175.20 ± 7.28                                           | 165.46 ± 12.05                                            | 171.60 ± 9.44                                           | 172.30 ± 17.16                                        |
| Liver           | 3.07 ± 0.17                                             | 2.97 ± 0.22                                                | 2.90 ± 0.19                                             | 2.96 ± 0.12                                               | 3.09 ± 0.16                                             | 3.56 ± 0.41*                                          |

---

|         |             |             |             |             |             |             |
|---------|-------------|-------------|-------------|-------------|-------------|-------------|
| Stomach | 0.39 ± 0.06 | 0.38 ± 0.06 | 0.33 ± 0.02 | 0.43 ± 0.09 | 0.52 ± 0.14 | 0.53 ± 0.26 |
|---------|-------------|-------------|-------------|-------------|-------------|-------------|

---

Negative control: Water; Solvent control: 0.5% MeOH; CYN: Cylindrospermopsin; MC-LR: Microcystin-LR; Positive control +: Ethylmethanesulfonate (EMS).  
The values are expressed as mean ± SD. Significantly different from the negative control (\**p* < 0.05)
